# Supplementary material for: Infantile Peanut Introduction and Peanut Allergy in Regions With a Low Prevalence of Peanut Allergy: The Japan Environment and Children’s Study (JECS)
Source: PubMed Central journal article supplement (PMC11167260; doi:10.2188/jea.je20230210), 2024-07-05
Supplement: je-34-324-s001.pdf [file je-34-324-s001.pdf]

**eTable 1.** Odds ratios of peanut reaction in relation to infantile peanut introduction

|                               | Number/Total<br>Number | (%)  | Crude OR | 95%CI     | Adjusted OR <sup>a</sup> | 95%CI     |
|-------------------------------|------------------------|------|----------|-----------|--------------------------|-----------|
| Total                         |                        |      |          |           |                          |           |
| Infantile peanut introduction |                        |      |          |           |                          |           |
| Yes                           | 10/3,294               | 0.3  | 0.63     | 0.33–1.18 | 0.66                     | 0.35–1.25 |
| No                            | 312/64,518             | 0.48 | ref      |           | ref                      |           |
| Without infantile eczema      |                        |      |          |           |                          |           |
| Infantile peanut introduction |                        |      |          |           |                          |           |
| Yes                           | 9/3,179                | 0.28 | 0.63     | 0.33–1.23 | 0.67                     | 0.34–1.30 |
| No                            | 277/61,936             | 0.45 | ref      |           | ref                      |           |
| With infantile eczema         |                        |      |          |           |                          |           |
| Infantile peanut introduction |                        |      |          |           |                          |           |
| Yes                           | 1/115                  | 0.87 | 0.64     | 0.09–4.70 | 0.59                     | 0.08–4.42 |
| No                            | 35/2,582               | 1.36 |          |           |                          |           |

CI, confidence interval; N/A, not applicable; OR, odds ratio; RD, risk difference.

<sup>a</sup> Adjusted for maternal history of allergy, passive smoking, maternal peanut intake during pregnancy, house income, mode of delivery, child sex, older siblings, and infantile eczema (unless stratified by the factor).

**eTable 2.** Odds ratios of peanut sensitization in relation to infantile peanut introduction

|                               | Number/Total<br>Number | (%)  | Crude OR | 95%CI     | Adjusted OR <sup>a</sup> | 95%CI     |
|-------------------------------|------------------------|------|----------|-----------|--------------------------|-----------|
| Total                         |                        |      |          |           |                          |           |
| Infantile peanut introduction |                        |      |          |           |                          |           |
| Yes                           | 3/3,294                | 0.09 | 0.25     | 0.08–0.77 | 0.28                     | 0.09–0.88 |
| No                            | 238/64,518             | 0.37 | ref      |           | ref                      |           |
| Without infantile eczema      |                        |      |          |           |                          |           |
| Infantile peanut introduction |                        |      |          |           |                          |           |
| Yes                           | 3/3,179                | 0.09 | 0.31     | 0.10–0.97 | 0.35                     | 0.11–1.10 |
| No                            | 188/61,936             | 0.3  | ref      |           | ref                      |           |
| With infantile eczema         |                        |      |          |           |                          |           |
| Infantile peanut introduction |                        |      |          |           |                          |           |
| Yes                           | 0/115                  | 0.00 | N/A      |           | N/A                      |           |
| No                            | 50/2,582               | 1.94 |          |           |                          |           |

CI, confidence interval; N/A, not applicable; OR, odds ratio; RD, risk difference.

<sup>a</sup> Adjusted for maternal history of allergy, passive smoking, maternal peanut intake during pregnancy, house income, mode of delivery, child sex, older siblings, and infantile eczema (unless stratified by the factor).
